# Supplementary material for: Potential Risk Factors Associated with Infection with Bovine Leukaemia Virus in Dairy and Beef Cattle in Taiwan
Source: Pathogens. 2021 Nov 29;10(12):1553. doi: 10.3390/pathogens10121553 (PMC8707763; doi:10.3390/pathogens10121553)
Supplement: Supplementary file 1 [file pathogens-10-01553-s001.zip › pathogens-1410732-supplementary.pdf]

**Table S1.** BLV proviral DNA prevalence in female beef cattle and dairy cows.

| Factors         | BLV detection     |                    |                 |            |              |                 |
|-----------------|-------------------|--------------------|-----------------|------------|--------------|-----------------|
|                 | Positive (n = 96) | Negative (n = 127) | <i>p</i> -value | Odds Ratio | 95% C.I.     | <i>p</i> -value |
| <b>Function</b> |                   |                    |                 |            |              |                 |
| Female beef     | 6                 | 61                 | <0.001 §        | Reference  | 5.655–33.987 | <0.001 ¶        |
| Lactating dairy | 90                | 66                 |                 | 13.864     |              |                 |

Differences of analytes within groups and BLV positivity was performed with the §Chi-square test and ¶Logistic regression. BLV, bovine leukaemia virus. C.I., confidence interval.  $p < 0.05$  indicates significant difference.
